# Supplementary material for: Genome-Wide Sensitivity Analysis of the Microsymbiont Sinorhizobium meliloti to Symbiotically Important, Defensin-Like Host Peptides
Source: PubMed Central journal article supplement (PMC5539429; doi:10.1128/mbio.01060-17), 2017-08-01

**Figure S2**

**A** One dose of NCR247AR (10 hour time point)

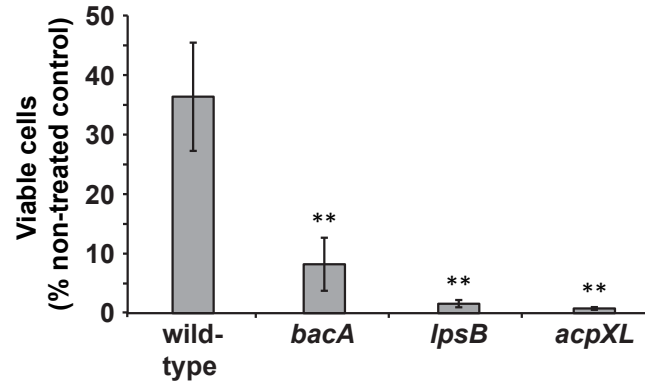

**B** Two doses of NCR247AR (24 hour time point)

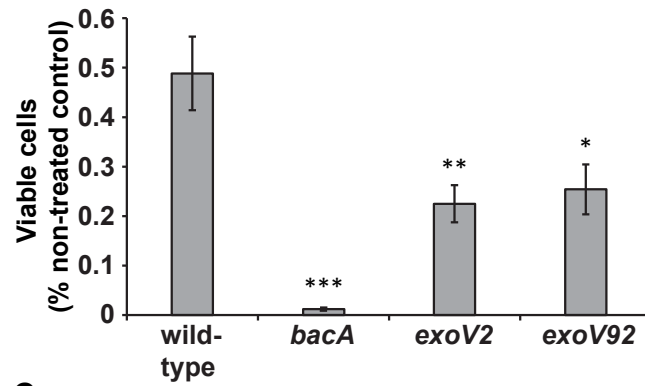

**C**

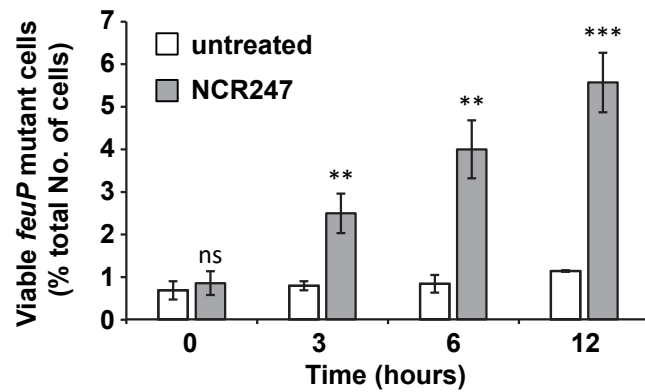

Supplement: mbo004173412sf2.pdf [file mbo004173412sf2.pdf]
