# Supplementary material for: Genome-Wide Sensitivity Analysis of the Microsymbiont Sinorhizobium meliloti to Symbiotically Important, Defensin-Like Host Peptides
Source: PubMed Central journal article supplement (PMC5539429; doi:10.1128/mbio.01060-17), 2017-08-01

Figure S4

**A** Alfalfa inoculated with *S. meliloti* 1021

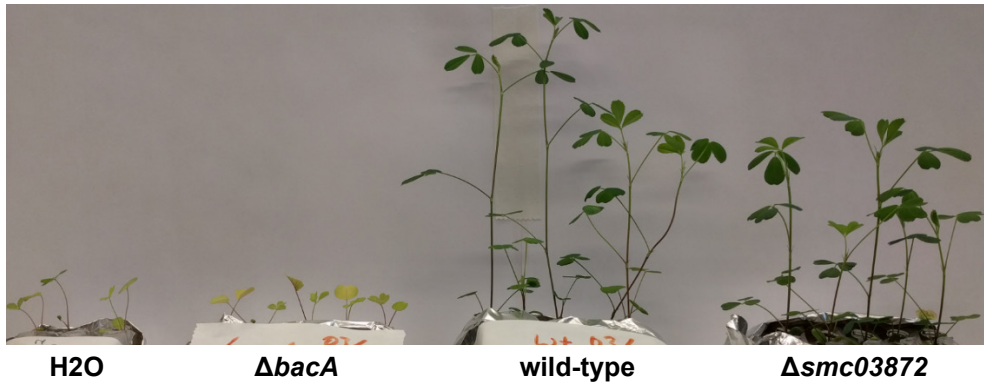

**B**

Plant inoculum

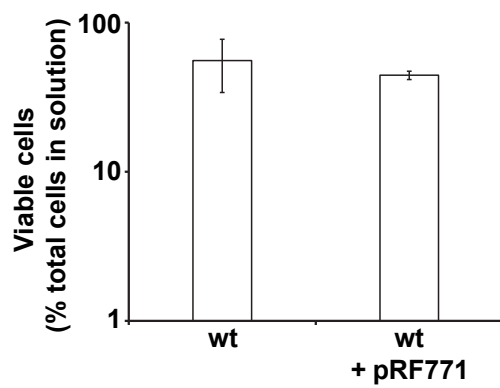

Alfalfa (*M. sativa*) nodules (21 days old)

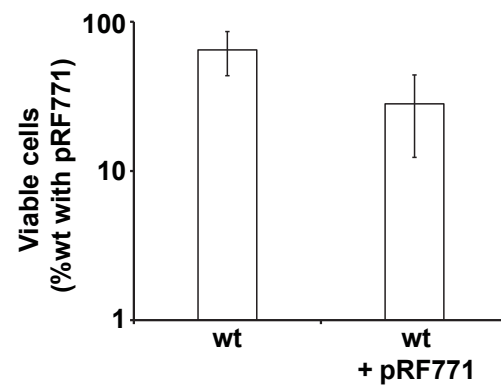

Supplement: mbo004173412sf4.pdf [file mbo004173412sf4.pdf]
