# Supplementary material for: Genome-Wide Sensitivity Analysis of the Microsymbiont Sinorhizobium meliloti to Symbiotically Important, Defensin-Like Host Peptides
Source: PubMed Central journal article supplement (PMC5539429; doi:10.1128/mbio.01060-17), 2017-08-01

**Figure S5**

**A**

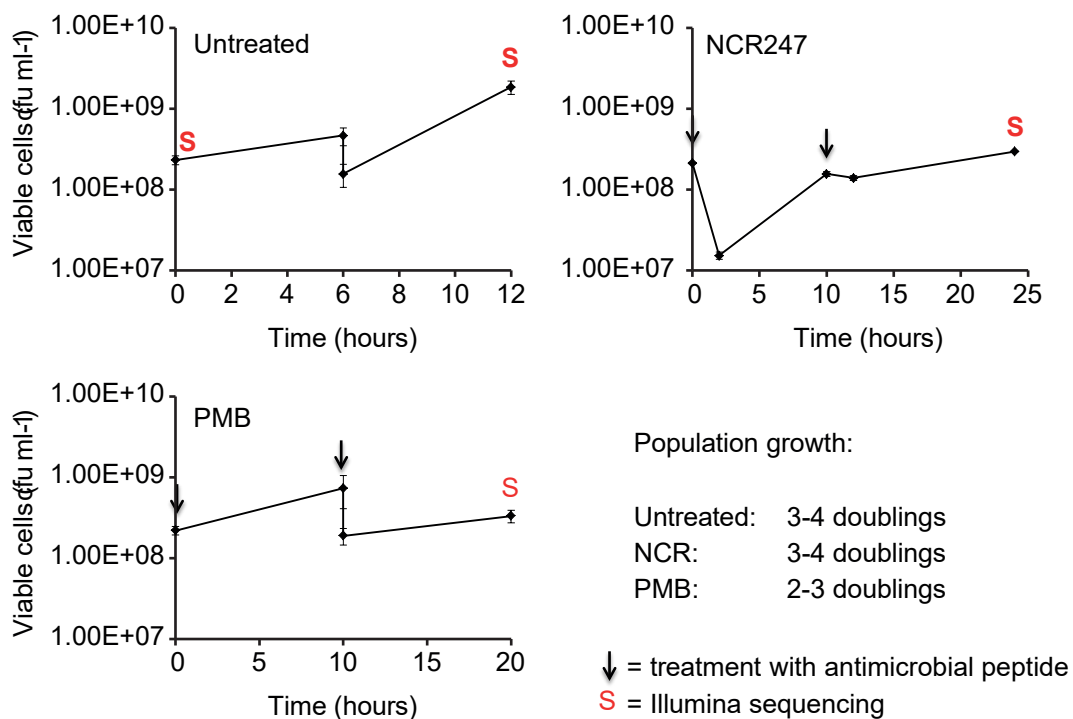

**B**

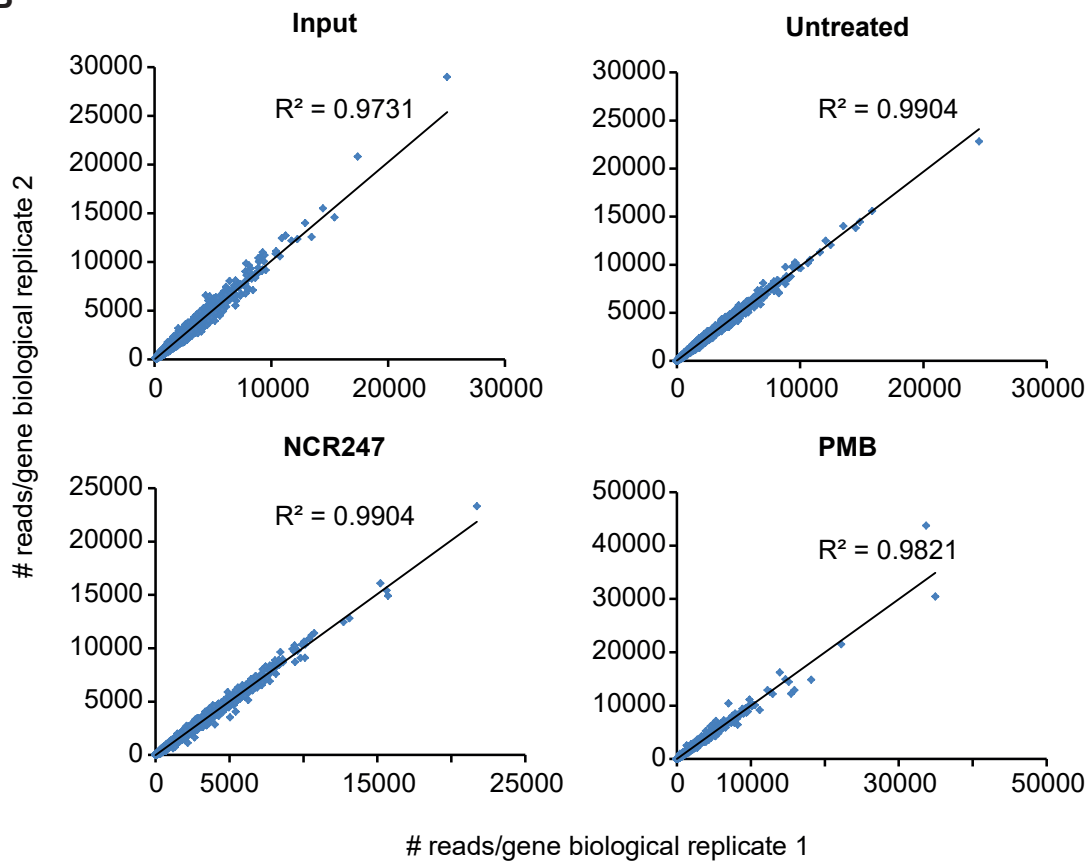

Supplement: mbo004173412sf5.pdf [file mbo004173412sf5.pdf]
